# Supplementary material for: Computational modeling identifies embolic stroke of undetermined source patients with potential arrhythmic substrate
Source: eLife. 2021 May 4;10:e64213. doi: 10.7554/eLife.64213 (PMC8143793; doi:10.7554/eLife.64213)
Supplement: Figure 2—source data 1. — ESUS and AFib patient ID numbers; inducibility status (i.e., whether RD-sustained arrhythmia was observed in the corresponding patient-specific LA model); and LA volumetric fibrosis burden (%) extracted directly from clinical report. [file elife-64213-fig2-data1.xlsx]

## Sheet: Sheet1
Patient	BinaryInducibility	Tag	Merisight_Fib
1	Non-Inducible	ESUS	16.3
2	Non-Inducible	ESUS	16
3	Non-Inducible	ESUS	11.1
4	Inducible	ESUS	23.6
5	Inducible	ESUS	21.2
6	Inducible	ESUS	12.6
7	Inducible	ESUS	23.4
8	Non-Inducible	ESUS	9.4
9	Inducible	ESUS	23.4
10	Non-Inducible	ESUS	10.8
2260	Inducible	ESUS	15
2262	Non-Inducible	ESUS	10
2645	Non-Inducible	ESUS	19.4
3134	Inducible	ESUS	19
4248	Non-Inducible	ESUS	11
4631	Non-Inducible	ESUS	8
7157	Inducible	ESUS	14.2
7765	Inducible	ESUS	16
8226	Non-Inducible	ESUS	6.6
8363	Non-Inducible	ESUS	12
9824	Inducible	ESUS	24.3
11817	Non-Inducible	ESUS	7
21171	Inducible	ESUS	17
21350	Inducible	ESUS	10
22343	Inducible	ESUS	12.3
31058	Non-Inducible	ESUS	13
31976	Inducible	ESUS	18.4
32741	Inducible	ESUS	6.9
32770	Inducible	ESUS	7.1
32852	Inducible	ESUS	14
41752	Inducible	ESUS	26.6
42166	Non-Inducible	ESUS	12
51453	Non-Inducible	ESUS	5
61783	Non-Inducible	ESUS	4
71436	Non-Inducible	ESUS	10.7
71439	Inducible	ESUS	9
91366	Inducible	ESUS	21
91872	Non-Inducible	ESUS	6.9
92740	Inducible	ESUS	22
93046	Non-Inducible	ESUS	16
100261	Inducible	ESUS	27.1
101237	Non-Inducible	ESUS	21.6
111051	Inducible	ESUS	10
111744	Non-Inducible	ESUS	8.4
120462	Inducible	ESUS	9.4
59	Non-Inducible	AF Control	10.5
62	Inducible	AF Control	18.3
69	Inducible	AF Control	17.6
105	Non-Inducible	AF Control	12.6
129	Inducible	AF Control	14.4
149	Non-Inducible	AF Control	13
154	Non-Inducible	AF Control	8.9
162	Inducible	AF Control	12.6
186	Non-Inducible	AF Control	12.4
190	Inducible	AF Control	15.9
194	Inducible	AF Control	24.1
202	Non-Inducible	AF Control	11.6
253	Non-Inducible	AF Control	14.3
256	Inducible	AF Control	14.3
328	Non-Inducible	AF Control	8.3
343	Inducible	AF Control	16.8
349	Inducible	AF Control	25.3
368	Non-Inducible	AF Control	9.3
371	Non-Inducible	AF Control	8.9
386	Inducible	AF Control	11
389	Inducible	AF Control	17.1
408	Non-Inducible	AF Control	12.3
427	Non-Inducible	AF Control	11.4
462	Non-Inducible	AF Control	8.2
538	Non-Inducible	AF Control	12.4
549	Inducible	AF Control	9.2
556	Non-Inducible	AF Control	14.4
584	Non-Inducible	AF Control	12.5
618	Inducible	AF Control	9.9
620	Inducible	AF Control	21.9
641	Inducible	AF Control	19.5
647	Non-Inducible	AF Control	10
659	Inducible	AF Control	14.3
682	Inducible	AF Control	18.4
684	Inducible	AF Control	23
711	Inducible	AF Control	14.9
735	Non-Inducible	AF Control	9
741	Inducible	AF Control	13.7
766	Non-Inducible	AF Control	9.3
779	Non-Inducible	AF Control	8.7
811	Inducible	AF Control	19
881	Non-Inducible	AF Control	6.8
1198	Non-Inducible	AF Control	9.6
1201	Non-Inducible	AF Control	17.3
1202	Inducible	AF Control	11.8
