# Supplementary material for: Computational modeling identifies embolic stroke of undetermined source patients with potential arrhythmic substrate
Source: eLife. 2021 May 4;10:e64213. doi: 10.7554/eLife.64213 (PMC8143793; doi:10.7554/eLife.64213)
Supplement: Figure 3—source data 1. — For each LA model used in the study: number of pacing sites that induced RD-sustained arrhythmia; number of unique RD locations; percentage of tissue significantly depolarized in quiescent state, as presented in Figure 3F. [file elife-64213-fig3-data1.xlsx]

## Sheet: Sheet1
Patient	NumberIndSites	Tag	Merisight_Fib	NumUniqRDs	Perc95
1	0	ESUS	16.3	0	0.059235
2	0	ESUS	16	0	0.093537
3	0	ESUS	11.1	0	0.041809
4	4	ESUS	23.6	1	0.115148
5	2	ESUS	21.2	1	0.097423
6	2	ESUS	12.6	1	0.037971
7	5	ESUS	23.4	4	0.144522
8	0	ESUS	9.4	0	0.013206
9	4	ESUS	23.4	2	0.097865
10	0	ESUS	10.8	0	0.023648
2260	2	ESUS	15	2	0.033557
2262	0	ESUS	10	0	0.031974
2645	0	ESUS	19.4	0	0.069968
3134	4	ESUS	19	2	0.096437
4248	0	ESUS	11	0	0.035255
4631	0	ESUS	8	0	0.030199
7157	6	ESUS	14.2	2	0.038572
7765	1	ESUS	16	1	0.056803
8226	0	ESUS	6.6	0	0.005767
8363	0	ESUS	12	0	0.022418
9824	3	ESUS	24.3	3	0.147276
11817	0	ESUS	7	0	0.009663
21171	2	ESUS	17	1	0.054692
21350	3	ESUS	10	1	0.028894
22343	2	ESUS	12.3	1	0.038137
31058	0	ESUS	13	0	0.036269
31976	2	ESUS	18.4	1	0.069932
32741	1	ESUS	6.9	1	0.007811
32770	1	ESUS	7.1	1	0.004268
32852	1	ESUS	14	1	0.040578
41752	7	ESUS	26.6	3	0.133293
42166	0	ESUS	12	0	0.02949
51453	0	ESUS	5	0	0.003549
61783	0	ESUS	4	0	0.010335
71436	0	ESUS	10.7	0	0.06176
71439	2	ESUS	9	2	0.033546
91366	1	ESUS	21	1	0.099094
91872	0	ESUS	6.9	0	0.012916
92740	2	ESUS	22	2	0.099985
93046	0	ESUS	16	0	0.038965
100261	9	ESUS	27.1	8	0.128313
101237	0	ESUS	21.6	0	0.101634
111051	1	ESUS	10	1	0.033623
111744	0	ESUS	8.4	0	0.021475
120462	3	ESUS	9.4	1	0.026531
59	0	AF Control	10.5	0	0.019633
62	4	AF Control	18.3	3	0.067974
69	1	AF Control	17.6	1	0.059347
105	0	AF Control	12.6	0	0.059532
129	1	AF Control	14.4	1	0.043654
149	0	AF Control	13	0	0.019881
154	0	AF Control	8.9	0	0.002935
162	5	AF Control	12.6	1	0.03917
186	0	AF Control	12.4	0	0.06627
190	1	AF Control	15.9	1	0.034169
194	3	AF Control	24.1	2	0.074287
202	0	AF Control	11.6	0	0.047047
253	0	AF Control	14.3	0	0.104874
256	9	AF Control	14.3	4	0.112098
328	0	AF Control	8.3	0	0.02422
343	1	AF Control	16.8	1	0.049256
349	6	AF Control	25.3	2	0.126842
368	0	AF Control	9.3	0	0.007299
371	0	AF Control	8.9	0	0.030058
386	1	AF Control	11	1	0.028694
389	3	AF Control	17.1	1	0.027666
408	0	AF Control	12.3	0	0.032466
427	0	AF Control	11.4	0	0.006792
462	0	AF Control	8.2	0	0.049964
538	0	AF Control	12.4	0	0.023641
549	1	AF Control	9.2	1	0.049794
556	0	AF Control	14.4	0	0.020456
584	0	AF Control	12.5	0	0.017455
618	3	AF Control	9.9	1	0.073501
620	7	AF Control	21.9	5	0.109575
641	4	AF Control	19.5	1	0.020792
647	0	AF Control	10	0	0.038401
659	4	AF Control	14.3	2	0.072088
682	1	AF Control	18.4	1	0.091054
684	6	AF Control	23	4	0.044342
711	1	AF Control	14.9	1	0.007394
735	0	AF Control	9	0	0.023702
741	3	AF Control	13.7	3	0.020733
766	0	AF Control	9.3	0	0.00889
779	0	AF Control	8.7	0	0.068369
811	7	AF Control	19	3	0.024892
881	0	AF Control	6.8	0	0.003723
1198	0	AF Control	9.6	0	0.025767
1201	0	AF Control	17.3	0	0.050097
1202	1	AF Control	11.8	1	0.033557
