# Supplementary material for: Computational modeling identifies embolic stroke of undetermined source patients with potential arrhythmic substrate
Source: eLife. 2021 May 4;10:e64213. doi: 10.7554/eLife.64213 (PMC8143793; doi:10.7554/eLife.64213)
Supplement: Figure 5—source data 1. — For each episode of RD-sustained arrhythmia induced in each patient-specific LA model, the location of the pacing associated pacing site and the LA region in which the RD ultimately anchored are provided. [file elife-64213-fig5-data1.xlsx]

## Sheet: Sheet1
Type	Patient Number	Pacing Location	My_Class_Unique
ESUS	4	RIPV1	Anterior
ESUS	4	RIPV2			My_Class_Unique is left blank if this simulation had a rotor that was not unique
ESUS	4	MV2			Non-inducible simulations are not included in this page.
ESUS	4	MV3
ESUS	5	RIPV1	Anterior
ESUS	5	LAA1
ESUS	6	LAA1	Anterior		Below is the information for which pacing site is considered to be in which region for IdS calculation
ESUS	6	LAA2			LSPV/LIPV 1/2 Are in LPV Region					4
ESUS	7	LIPV2			RSPV/RIPV 1/2 are in RPV region					4
ESUS	7	RIPV1	Atrial Floor		MV 3/4 are in Atrial Floor Region					2
ESUS	7	MV2	Anterior		MV 1/2 LAA 1/2 are in Anterior Region					4
ESUS	7	PostWall	LPV		PostWall is in PostWall region					1
ESUS	7	LAA1	Atrial Floor							15	Total Sites
ESUS	9	LIPV2	Anterior
ESUS	9	RIPV2
ESUS	9	MV1	Anterior
ESUS	9	PostWall
AF Control	62	RIPV2
AF Control	62	LIPV1	LPV
AF Control	62	MV1	LPV
AF Control	62	LAA2	Anterior
AF Control	69	MV4	LPV
AF Control	129	LAA1	Atrial Floor
AF Control	162	LIPV1	Anterior
AF Control	162	LIPV2
AF Control	162	LSPV2
AF Control	162	RSPV1
AF Control	162	LAA1
AF Control	190	RSPV2	LPV
AF Control	194	RSPV2
AF Control	194	RIPV1	LPV
AF Control	194	RIPV2	PW
AF Control	256	LIPV2
AF Control	256	LSPV2
AF Control	256	RIPV1
AF Control	256	RSPV1
AF Control	256	PostWall
AF Control	256	LIPV1	PW
AF Control	256	LSPV1	RPV
AF Control	256	RIPV2	RPV
AF Control	256	LAA1	Anterior
AF Control	343	RIPV1	RPV
AF Control	349	RSPV1
AF Control	349	RSPV2
AF Control	349	MV1
AF Control	349	PostWall
AF Control	349	RIPV2	LPV
AF Control	349	LAA1	Anterior
AF Control	386	LSPV1	LPV
AF Control	389	LIPV2	LPV
AF Control	389	LSPV1
AF Control	389	LSPV2
AF Control	549	LIPV2	LPV
AF Control	618	LIPV1	RPV
AF Control	618	LIPV2
AF Control	618	PostWall
AF Control	620	MV3
AF Control	620	PostWall
AF Control	620	LIPV1	RPV
AF Control	620	LSPV1	PW
AF Control	620	RIPV1	LPV
AF Control	620	RIPV2	Anterior
AF Control	620	RSPV2	Atrial Floor
AF Control	641	LIPV1	LPV
AF Control	641	LIPV2
AF Control	641	LSPV1
AF Control	641	LSPV2
AF Control	659	LIPV1	LPV
AF Control	659	LIPV2	LPV
AF Control	659	LSPV1
AF Control	659	MV2
AF Control	682	MV1	Anterior
AF Control	684	LSPV1	Atrial Floor
AF Control	684	RSPV2	PW
AF Control	684	MV2	RPV
AF Control	684	PostWall	LPV
AF Control	684	MV1
AF Control	684	MV4
AF Control	711	MV1	Anterior
AF Control	741	LIPV2	LPV
AF Control	741	MV2	Anterior
AF Control	741	LAA1	LPV
AF Control	811	LIPV1	PW
AF Control	811	MV3	PW
AF Control	811	PostWall	LPV
AF Control	811	LIPV2
AF Control	811	LSPV2
AF Control	811	MV4
AF Control	811	LAA1
AF Control	1202	MV1	Anterior
ESUS	2260	MV3	Atrial Floor
ESUS	2260	MV4	Anterior
ESUS	3134	LSPV1	Anterior
ESUS	3134	LSPV2
ESUS	3134	RSPV1	LPV
ESUS	3134	LAA2
ESUS	7157	LIPV1	LPV
ESUS	7157	LIPV2
ESUS	7157	LSPV1
ESUS	7157	LSPV2
ESUS	7157	RIPV1
ESUS	7157	MV2	Anterior
ESUS	7765	RSPV1	RPV
ESUS	9824	LIPV2	Anterior
ESUS	9824	LSPV1	PW
ESUS	9824	MV2	Atrial Floor
ESUS	21171	MV2	Anterior
ESUS	21171	MV4
ESUS	21350	RIPV2	Atrial Floor
ESUS	21350	RSPV1
ESUS	21350	MV4
ESUS	22343	LSPV1	LPV
ESUS	22343	LAA1
ESUS	31976	MV2	Anterior
ESUS	31976	LAA2
ESUS	32741	PostWall	PW
ESUS	32770	MV1	LPV
ESUS	32852	LSPV1	Atrial Floor
ESUS	41752	RIPV1	Anterior
ESUS	41752	RIPV2
ESUS	41752	RSPV1
ESUS	41752	MV1	RPV
ESUS	41752	MV3
ESUS	41752	MV4	Anterior
ESUS	41752	LAA1
ESUS	71439	LIPV2	LPV
ESUS	71439	LSPV1	RPV
ESUS	91366	LSPV1	PW
ESUS	92740	LIPV1	PW
ESUS	92740	LSPV2	LPV
ESUS	100261	LIPV1	Anterior
ESUS	100261	RIPV1	RPV
ESUS	100261	RIPV2	Atrial Floor
ESUS	100261	RSPV1	RPV
ESUS	100261	RSPV2
ESUS	100261	MV1	RPV
ESUS	100261	MV2	Anterior
ESUS	100261	MV4	LPV
ESUS	100261	LAA2	Atrial Floor
ESUS	111051	LIPV2
ESUS	120462	LSPV2	LPV
ESUS	120462	RSPV1
ESUS	120462	RSPV2
