# Supplementary material for: Computational modeling identifies embolic stroke of undetermined source patients with potential arrhythmic substrate
Source: eLife. 2021 May 4;10:e64213. doi: 10.7554/eLife.64213 (PMC8143793; doi:10.7554/eLife.64213)
Supplement: Figure 6—source data 1. — For each LA model used in the study, proportion of pro-RD tissue (as calculated by previously established machine learning-based analysis of fibrosis spatial pattern) in each LA region. [file elife-64213-fig6-data1.xlsx]

## Sheet: Sheet1
Patient	BinaryInducibility	Tag	LPV	ANT LA + LAA	Post Wall	RPV	Lat LA + MV
1	Non-Inducible	ESUS	0.158147	0.169249	0.188912	0.339975	0.254554
2	Non-Inducible	ESUS	0.195842	0.109071	0.273741	0.121202	0.135462
3	Non-Inducible	ESUS	0.0423263	0.0996569	0.111155	0.188832	0.0235047
4	Inducible	ESUS	0.348395	0.153744	0.245247	0.392544	0.366667
5	Inducible	ESUS	0.444007	0.2808	0.0874192	0.20806	0.406767
6	Inducible	ESUS	0.0471888	0.146131	0.0590595	0.138779	0.0999552
7	Inducible	ESUS	0.177616	0.154549	0.254354	0.368061	0.264613
8	Non-Inducible	ESUS	0.0914873	0.080309	0.0420666	0.0767098	0.0759202
9	Inducible	ESUS	0.525888	0.276802	0.449927	0.37562	0.0140612
10	Non-Inducible	ESUS	0.155874	0.0881102	0.116092	0.0221811	0.220629
2260	Inducible	ESUS	0.138722	0.159259	0.131283	0.169042	0.401569
2262	Non-Inducible	ESUS	0.219657	0.0428012	0.21958	0.12531	0.124435
2645	Non-Inducible	ESUS	0.307092	0.251035	0.31413	0.145587	0.0181598
3134	Inducible	ESUS	0.483128	0.16901	0.222959	0.00556647	0.190005
4248	Non-Inducible	ESUS	0.083792	0.0446735	0.116302	0.214307	0.232189
4631	Non-Inducible	ESUS	0.148889	0.0552843	0.205968	0.0150195	0.0860664
7157	Inducible	ESUS	0.161429	0.139531	0.112936	0.265996	0.162828
7765	Inducible	ESUS	0.0244613	0.156112	0.137852	0.3327	0.265565
8226	Non-Inducible	ESUS	0.187847	0.0304543	0.1754	0.0555749	0.0414234
8363	Non-Inducible	ESUS	0.404552	0.069715	0.128818	0.0691176	0.0443065
9824	Inducible	ESUS	0.152857	0.343808	0.475776	0.260463	0.182582
11817	Non-Inducible	ESUS	0.186922	0.019012	0.195558	0.0165587	0.0695098
21171	Inducible	ESUS	0.0998129	0.118475	0.187452	0.150682	0.160126
21350	Inducible	ESUS	0.0825933	0.135375	0.10095	0.214307	0.216388
22343	Inducible	ESUS	0.233525	0.0819939	0.208333	0.155528	0.0273944
31058	Non-Inducible	ESUS	0.167738	0.126299	0.0451389	0.0182724	0.179835
31976	Inducible	ESUS	0.237371	0.10929	0.272531	0.199933	0.0841902
32741	Inducible	ESUS	0.0369258	0.0439579	0.228948	0.0595495	0.0387665
32770	Inducible	ESUS	0.150454	0.11405	0.0399729	0.0254613	0.0194627
32852	Inducible	ESUS	0.0586163	0.0814694	0.242552	0.195297	0.220226
41752	Inducible	ESUS	0.0233368	0.288198	0.333631	0.332677	0.377624
42166	Non-Inducible	ESUS	0.21409	0.0609307	0.14915	0.0392328	0.126155
51453	Non-Inducible	ESUS	0.22014	0.0098529	0.0784394	0	0
61783	Non-Inducible	ESUS	0.128743	0.00776109	0.0150862	0	0.0923191
71436	Non-Inducible	ESUS	0.19095	0.0329208	0.155616	0.0446296	0.074794
71439	Inducible	ESUS	0.210586	0.102755	0.00290314	0.0329516	0.0147574
91366	Inducible	ESUS	0.0889248	0.221376	0.233073	0.233372	0.348099
91872	Non-Inducible	ESUS	0.0263736	0.0549562	0.111181	0.0711038	0.1548
92740	Inducible	ESUS	0.279851	0.256271	0.094939	0.0217815	0.192385
93046	Non-Inducible	ESUS	0.273518	0.105881	0.259062	0.104757	0.243177
100261	Inducible	ESUS	0.261207	0.308495	0.42337	0.336338	0.347128
101237	Non-Inducible	ESUS	0.106887	0.256231	0.137507	0.227738	0.0876697
111051	Inducible	ESUS	0.204537	0.0505498	0.173913	0.122379	0.00247586
111744	Non-Inducible	ESUS	0.0742937	0.0056559	0.124068	0.111111	0.232711
120462	Inducible	ESUS	0.239964	0.170278	0.0482333	0	0.0187547
59	Non-Inducible	AF Control	0.0772142	0.0934276	0.20372	0.0836844	0.0193901
62	Inducible	AF Control	0.505854	0.112116	0.315094	0.307931	0.0509491
69	Inducible	AF Control	0.31181	0.290771	0.107414	0.0987226	0.125071
105	Non-Inducible	AF Control	0.253324	0.0853341	0.180404	0.110254	0.0203647
129	Inducible	AF Control	0.157656	0.100841	0.144902	0.133953	0.133378
149	Non-Inducible	AF Control	0.155122	0.0561282	0.065342	0.0692666	0.0890745
154	Non-Inducible	AF Control	0.105063	0.0800998	0.0363155	0.0763909	0.0397163
162	Inducible	AF Control	0.0836106	0.116185	0.17182	0.123605	0.0987333
186	Non-Inducible	AF Control	0.105068	0.114669	0.232687	0.0856827	0.151989
190	Inducible	AF Control	0.282122	0.243175	0.080292	0.132455	0.0532906
194	Inducible	AF Control	0.27717	0.226103	0.272587	0.242993	0.249675
202	Non-Inducible	AF Control	0.168505	0.107824	0.208534	0.0538237	0.226146
253	Non-Inducible	AF Control	0.465059	0.0597621	0.171178	0.0424151	0.082095
256	Inducible	AF Control	0.397348	0.257734	0.391875	0.24537	0.161767
328	Non-Inducible	AF Control	0.324363	0.0721741	0.0567193	0.0107944	0.0516172
343	Inducible	AF Control	0.224192	0.0765766	0.0382653	0.206897	0.282891
349	Inducible	AF Control	0.294909	0.190274	0.233316	0.244253	0.229076
368	Non-Inducible	AF Control	0.104024	0.0625344	0.0381634	0.00863269	0.155713
371	Non-Inducible	AF Control	0.076775	0.10347	0.0918409	0.0514163	0.147957
386	Inducible	AF Control	0.297967	0.0953728	0.0244352	0.103796	0.0282793
389	Inducible	AF Control	0.35098	0.132612	0.186473	0.09599	0.131099
408	Non-Inducible	AF Control	0.269728	0.113006	0.0483757	0.126365	0.240131
427	Non-Inducible	AF Control	0.0322492	0.157644	0.127191	0.10789	0.0401567
462	Non-Inducible	AF Control	0.167356	0.0837798	0.0526023	0.0453786	0.0556428
538	Non-Inducible	AF Control	0.244369	0.0938128	0.294543	0.125277	0.0997937
549	Inducible	AF Control	0.159483	0.0692943	0.1489	0.0945773	0.0436047
556	Non-Inducible	AF Control	0.215408	0.269943	0.0285485	0.0545256	0.0961039
584	Non-Inducible	AF Control	0.0971799	0.17032	0.110531	0.0642884	0.0698743
618	Inducible	AF Control	0.219897	0.0467564	0.0832856	0.103695	0.0682794
620	Inducible	AF Control	0.320811	0.322708	0.143328	0.301085	0.304786
641	Inducible	AF Control	0.28921	0.193629	0.255928	0.100319	0.153211
647	Non-Inducible	AF Control	0.143481	0.0618382	0.177444	0.0323648	0.0822828
659	Inducible	AF Control	0.252272	0.075157	0.165379	0.0976613	0.0863727
682	Inducible	AF Control	0.302086	0.235849	0.10172	0.170217	0.288193
684	Inducible	AF Control	0.339258	0.207323	0.316337	0.271576	0.154118
711	Inducible	AF Control	0.173936	0.0898045	0.074184	0.24346	0.208822
735	Non-Inducible	AF Control	0.297905	0.0608662	0.0103884	0.0518499	0.0177234
741	Inducible	AF Control	0.234655	0.103704	0.0981945	0.120746	0.306043
766	Non-Inducible	AF Control	0.116995	0.187849	0.0572079	0.0469873	0.0719465
779	Non-Inducible	AF Control	0.107379	0.0522748	0.103737	0.217267	0.0227721
811	Inducible	AF Control	0.16406	0.20704	0.19262	0.224758	0.200041
881	Non-Inducible	AF Control	0.125969	0.0382217	0.199938	0.0928584	0.0481027
1198	Non-Inducible	AF Control	0.092	0.0980544	0.0817967	0.0771144	0.0762367
1201	Non-Inducible	AF Control	0.295043	0.13761	0.106127	0.129381	0.106156
1202	Inducible	AF Control	0.270594	0.0700411	0.204157	0.0906054	0.106045
