# Supplementary figures and images for: Computational modeling identifies embolic stroke of undetermined source patients with potential arrhythmic substrate
Source: eLife journal article supplement (doi:10.7554/elife.64213), 2021-04-28

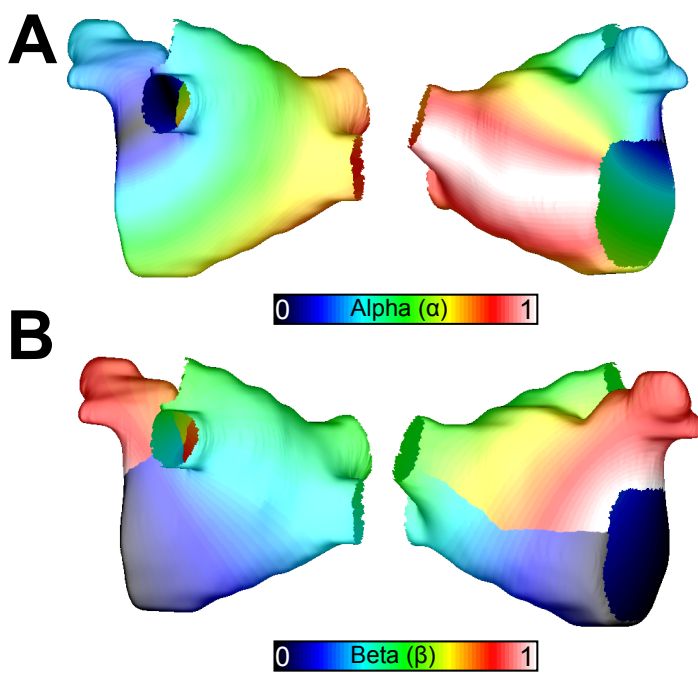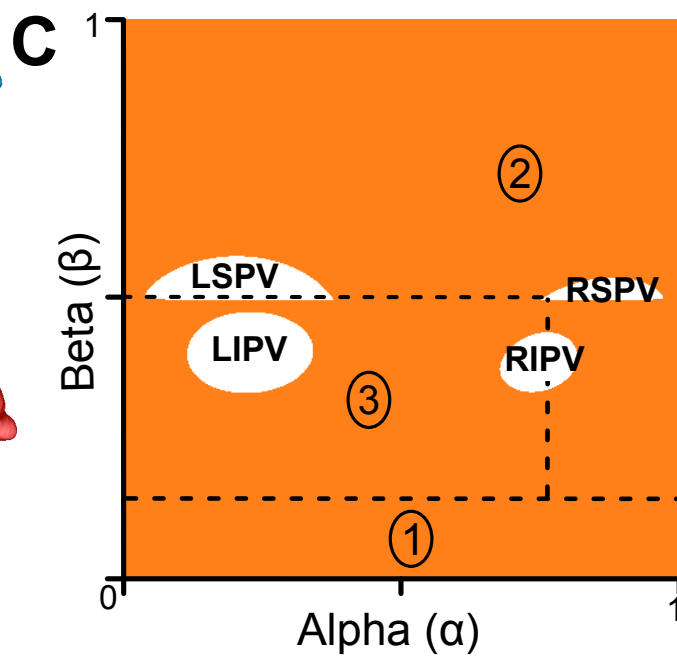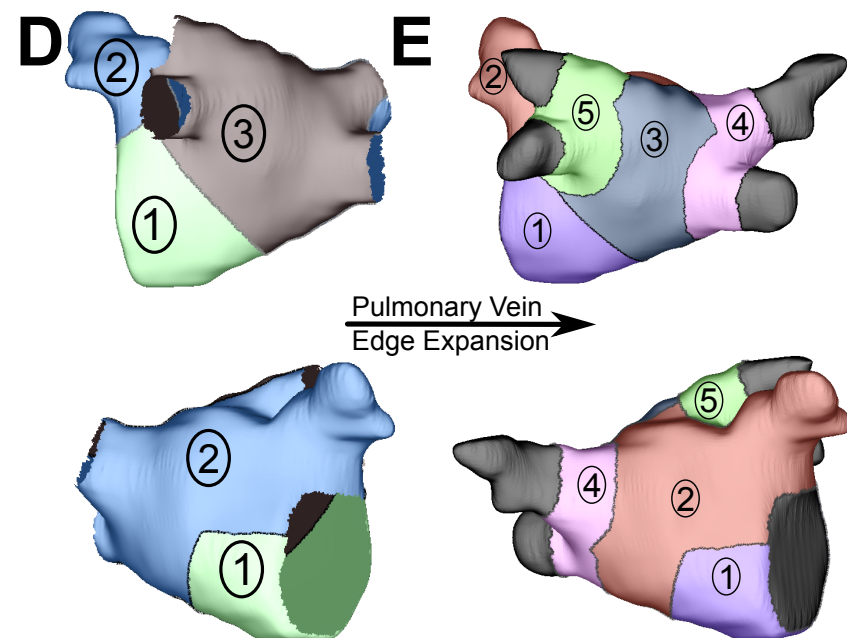

Supplement: supp [file elife-64213-supp-v1.zip]
